# Supplementary material
Source: HighWire-hosted journal article supplement (https://erj.ersjournals.com/content/61/4/2300240)
Supplement: inline-supplementary-material-1 [file inline-supplementary-material-1.pdf]

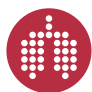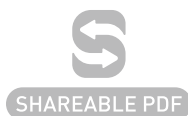

# Another piece in the pirfenidone puzzle

Mareike Lehmann <sup>1,2,3</sup> and Martin Kolb <sup>4</sup>

<sup>1</sup>Institute for Lung Research, Philipps-University Marburg, Member of the German Center for Lung Research (DZL), Marburg, Germany.

<sup>2</sup>Institute of Lung Health and Immunity, Comprehensive Pneumology Center Munich, Helmholtz Zentrum München, Munich, Germany.

<sup>3</sup>Member of the German Center for Lung Research (DZL), Munich, Germany. <sup>4</sup>Firestone Institute for Respiratory Health, Division of Respirology, Department of Medicine, McMaster University, Hamilton, ON, Canada.

Corresponding author: Mareike Lehmann ([mareike.lehmann@uni-marburg.de](mailto:mareike.lehmann@uni-marburg.de))

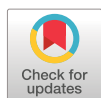

Shareable abstract (@ERSpublications)

An editorial discussing the recent article by Ma and co-workers that contributes another puzzle piece to the mechanism of action for pirfenidone with elegant *in vitro* and *in situ* studies, and importantly, using a clinically relevant drug concentration <https://bit.ly/40Vi0zr>

**Cite this article as:** Lehmann M, Kolb M. Another piece in the pirfenidone puzzle. *Eur Respir J* 2023; 61: 2300240 [DOI: 10.1183/13993003.00240-2023].

This single-page version can be shared freely online.

Copyright ©The authors 2023.  
For reproduction rights and  
permissions contact  
[permissions@ersnet.org](mailto:permissions@ersnet.org)

Received: 9 Feb 2023  
Accepted: 10 Feb 2023

Clinical studies and real-world experience show that pirfenidone is effective in decelerating disease progression in idiopathic pulmonary fibrosis (IPF) patients. However, many of the details that define its molecular mechanisms are still unknown. Yes, it works, but how exactly? And why should we care? Identifying the missing pieces and completing the puzzle will be helpful for the development of more specific and hopefully better therapeutics, and instrumental in developing effective combination therapies that have a better safety profile while simultaneously allowing for disease progression to be halted, or perhaps even an improvement in lung function.
